# Supplementary material
Source: publisher figshare collection journal article supplement (https://future-science-group.figshare.com/articles/dataset/_/23130740)
Supplement: Supplementary file 1 [file 1]

**Table S1: Summary of studies on Theragnostic applications of nanoparticle - IgY**

| **Year** | **Author's Name** | **Target** | **Type of NP** | **IgY Dosage** | **Outcome** |
| --- | --- | --- | --- | --- | --- |
| 2009 | Xiao *et al* (55) | To detect and selectively destruct cancer cells | HER2 IgY-SWCN complex | 60 μL of (1.0 mg/mL) chicken anti-HER2 IgY antibody (Conjugation) | Successfully used *in-vitro* for both detection and selective destruction of HER2 expressing breast cancer cells |
